# Supplementary material for: Heparin Anticoagulant for Human Bone Marrow Does Not Influence In Vitro Performance of Human Mesenchymal Stromal Cells
Source: MDPI journal article supplement (doi:10.3390/cells9071580), 2020-06-29
Supplement: s1 [file s1]

## Supplemental Material

**Supplemental Table S1:** Information on bone marrow donors and passages of cells used in the analyses

depicted in Figure 1 and Supplemental Figures S1 and S2. n. a.: not available

| Donor | Gender (m/f) | Age   |
|-------|--------------|-------|
| AA    | f            | 42    |
| BB    | m            | 49    |
| CC    | m            | 36    |
| DD    | m            | 52    |
| EE    | m            | 21    |
| FF    | f            | 69    |
| GG    | f            | 74    |
| HH    | f            | 81    |
| II    | f            | 45    |
| JJ    | m            | 60    |
| KK    | m            | 63    |
| LL    | m            | 79    |
| MM    | f            | 76    |
| NN    | m            | 79    |
| OO    | f            | 72    |
| PP    | f            | 71    |
| QQ    | m            | n. a. |
| RR    | f            | 48    |
| SS    | f            | 41    |

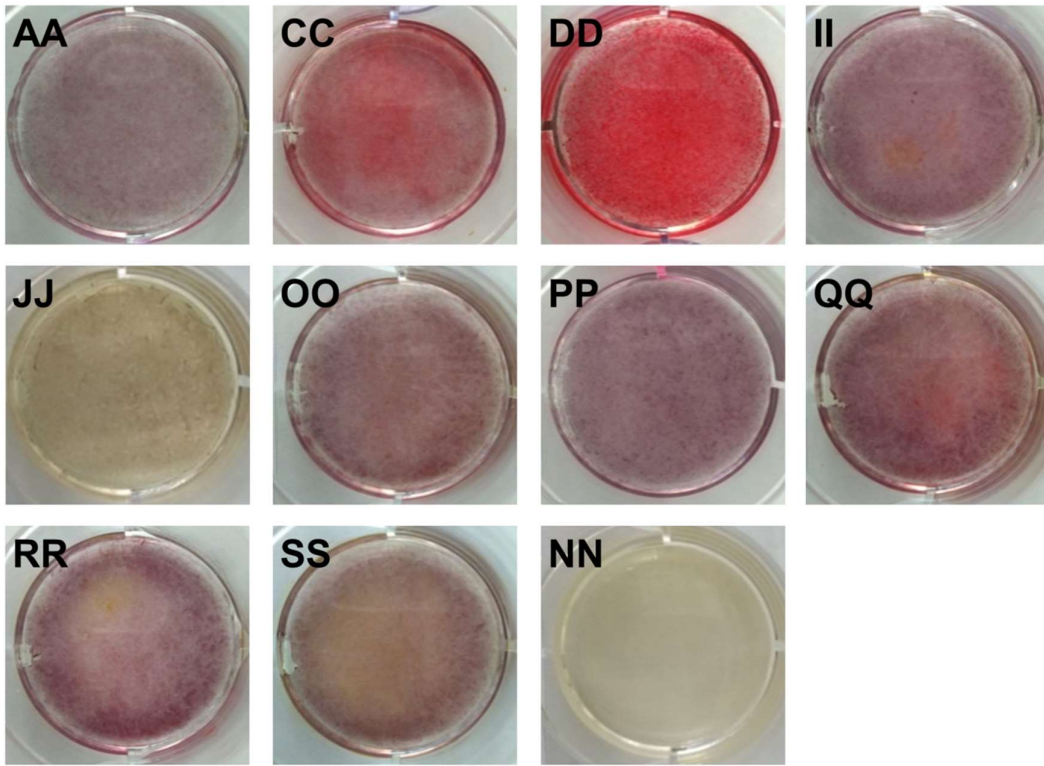

**Supplemental Figure S1 (related to Figure 1).** Osteogenic differentiation *in vitro*. Differentiation was performed for 27 days with 100 nM dexamethasone as described in Materials and Methods (cf. Supplemental Table S1 for information on donors). Alizarin Red S-staining to detect calcium ions in the cell layer.

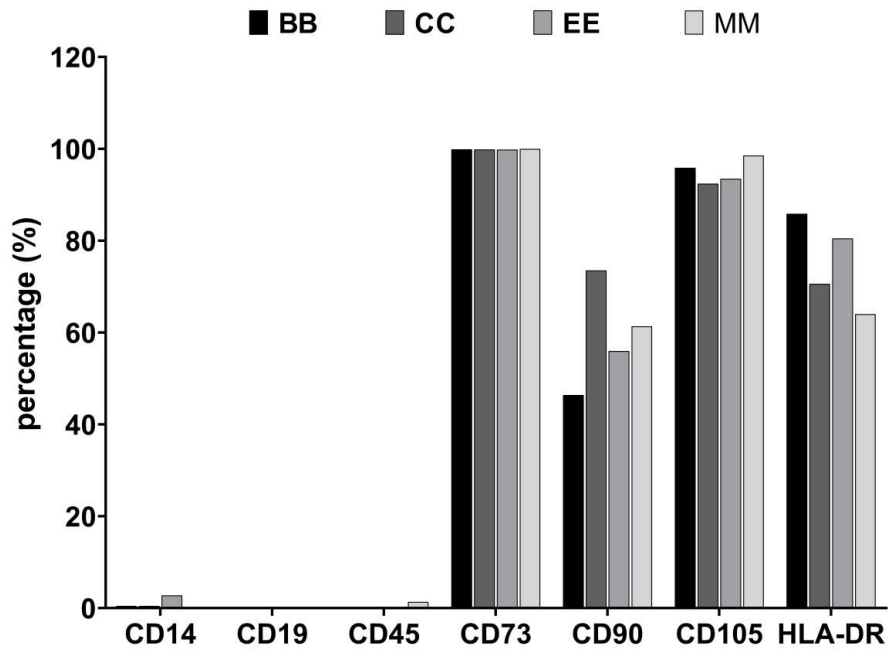

Supplemental Figure S2 (related to Figure 1). Flow cytometric data of four representative MSC populations characterized by osteogenic differentiation in Figure 1 and Supplemental Figure S1.

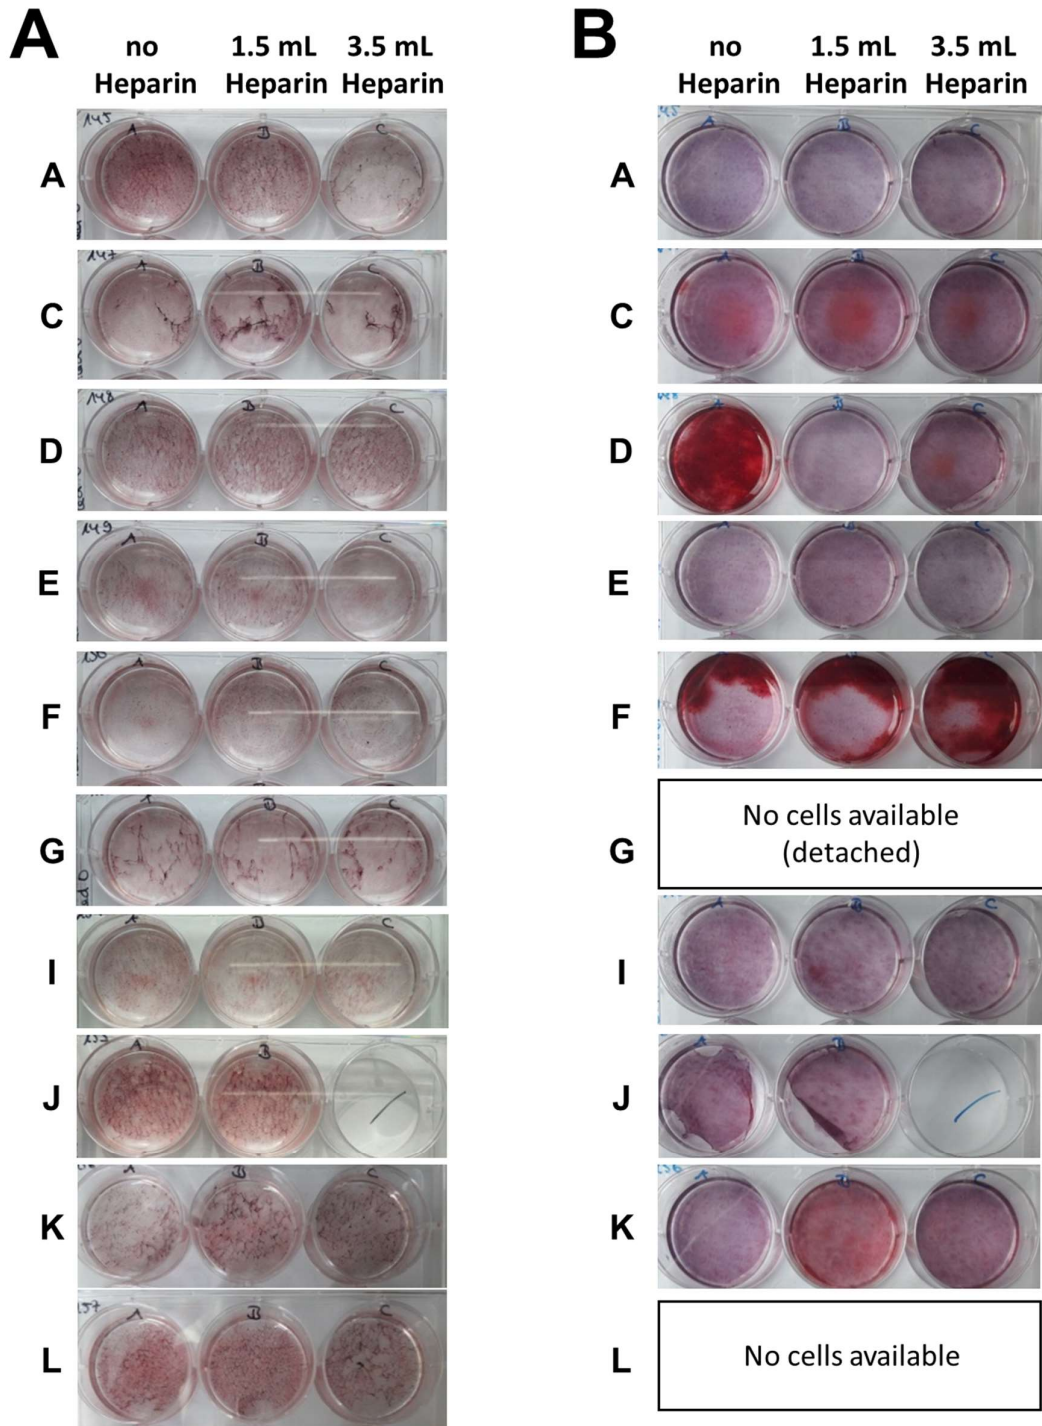

**Supplemental Figure S3 (related to Figures 5 and 6).** Results of *in vitro* differentiation. **(A)** Photos of Oil Red O-stained cell layers in sixwell-plates after 14 days of adipogenic differentiation. **(B)** Photos of Alizarin Red S-stained cell layers in sixwell-plates after 27 days of osteogenic differentiation.

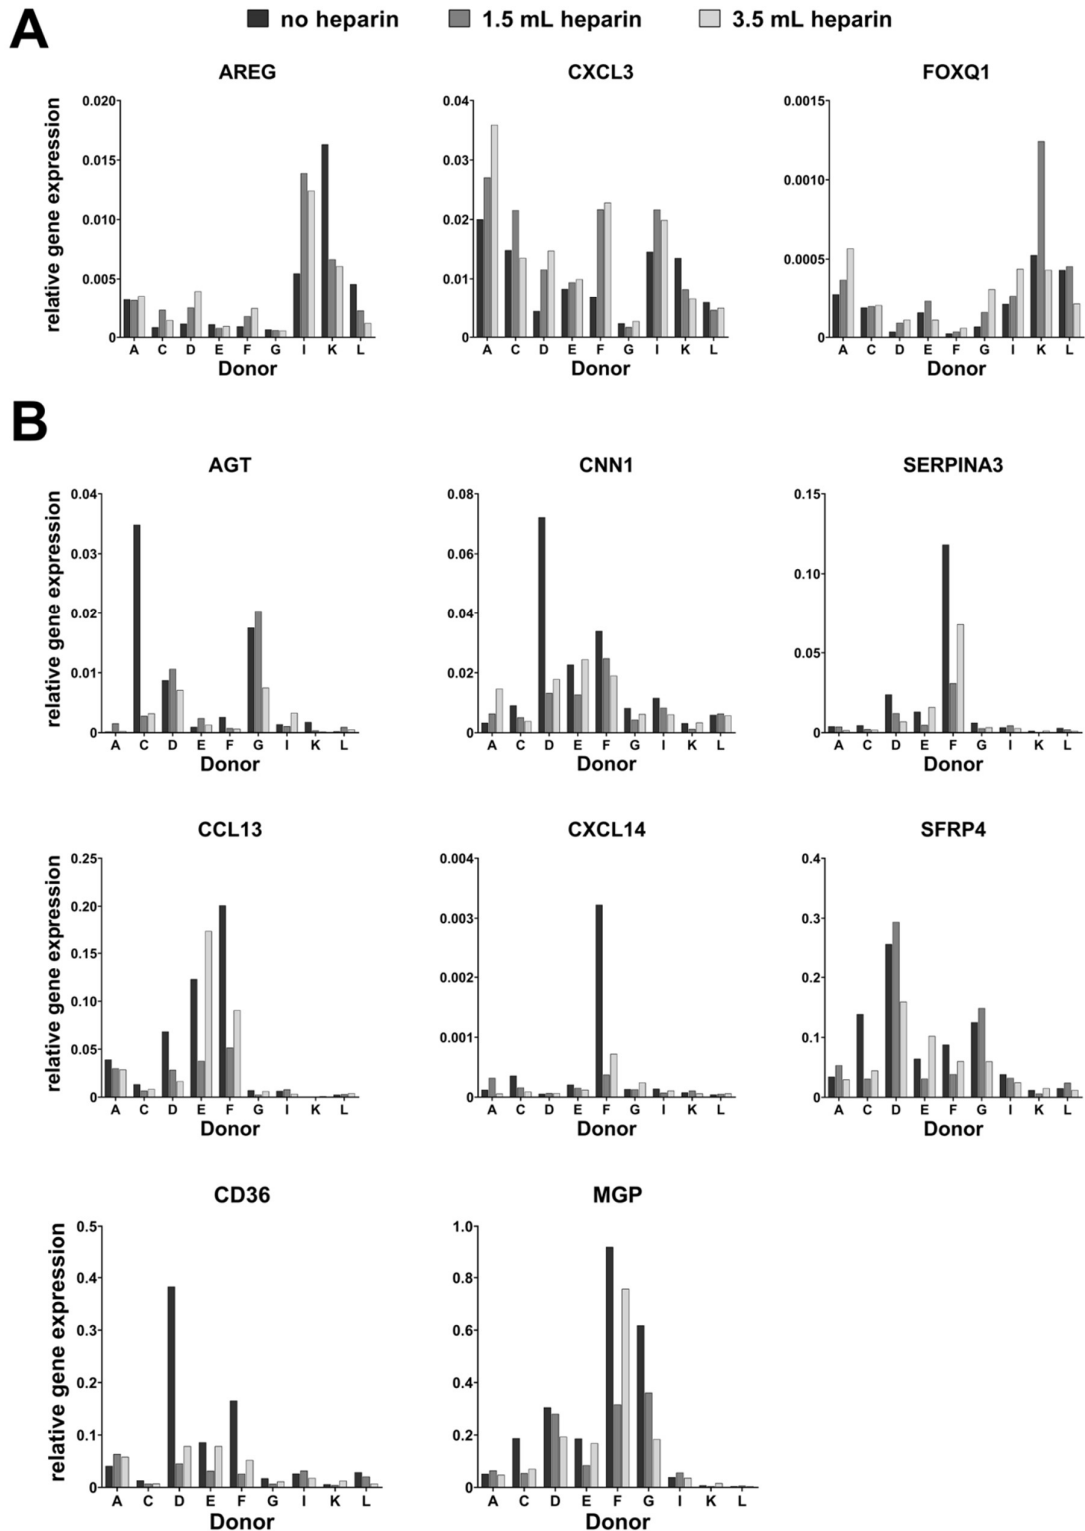

Supplemental Figure S4 (related to Figure 8). qRT-PCR analysis for genes selected from the results of transcriptome analyses. (A) Relative gene expressions ( $2^{-\Delta C_t}$ ) of three genes identified to be upregulated by heparin. (B) Relative gene expressions ( $2^{-\Delta C_t}$ ) of eight genes identified to be downregulated.
